# Supplementary material for: Cysteine-Rich Receptor-Like Kinase Gene Family Identification in the Phaseolus Genome and Comparative Analysis of Their Expression Profiles Specific to Mycorrhizal and Rhizobial Symbiosis
Source: MDPI journal article supplement (doi:10.3390/genes10010059), 2019-01-17
Supplement: s1 [file s1]

**Figure S4.** Multiple sequence alignment of *PvCRK* genes using CLUSTAL.

```

CRK1  -----
CRK2  -----
CRK3  -----
CRK4  -----
CRK5  -----
CRK6  -----
CRK7  -----
CRK8  -----
CRK9  MASYKILIFFILINFLNFAITEPQDYSPLYQYCSSEQTIDNTSLQVYVEKLLNNLSSLSS 60
CRK10 -----
CRK11 -----
CRK12 -----
CRK13 -----
CRK14 -----
CRK15 -----
CRK16 -----
CRK17 -----
CRK18 -----
CRK19 -----
CRK20 -----
CRK21 -----
CRK22 -----
CRK23 -----
CRK24 -----
CRK25 -----
CRK26 -----
CRK27 -----
CRK28 -----
CRK29 -----
CRK30 -----
CRK31 -----
CRK32 -----
CRK33 -----
CRK34 -----
CRK35 -----
CRK36 -----
CRK37 -----
CRK38 -----
CRK39 -----
CRK40 -----
CRK41 -----
CRK42 -----
CRK43 -----
CRK44 -----
CRK45 -----
CRK46 -----

CRK1  -----
CRK2  -----
CRK3  -----
CRK4  -----
CRK5  -----
CRK6  -----
CRK7  -----
CRK8  -----
CRK9  GHTQYNTNFSCANPSDSIYGLFMCRGDTSPPLCQQCVQSAKNRLSSECSLSKESVTWYEE 120
CRK10 -----
CRK11 -----
CRK12 -----
CRK13 -----
CRK14 -----
CRK15 -----
CRK16 -----
CRK17 -----
CRK18 -----
CRK19 -----
CRK20 -----
CRK21 -----
CRK22 -----
CRK23 -----

```

CRK24 -----  
 CRK25 -----  
 CRK26 -----  
 CRK27 -----  
 CRK28 -----  
 CRK29 -----  
 CRK30 -----  
 CRK31 -----  
 CRK32 -----  
 CRK33 -----  
 CRK34 -----  
 CRK35 -----  
 CRK36 -----  
 CRK37 -----  
 CRK38 -----  
 CRK39 -----  
 CRK40 -----  
 CRK41 -----  
 CRK42 -----  
 CRK43 -----  
 CRK44 -----  
 CRK45 -----  
 CRK46 -----

CRK1 -----  
 CRK2 -----  
 CRK3 -----  
 CRK4 -----  
 CRK5 -----  
 CRK6 -----  
 CRK7 -----  
 CRK8 -----  
 CRK9 CMVRYSTNYFFSTETTICQNTGKVVSNPENFTQLYFETMNKTADEAAHAPVVNNNNKMFS 180  
 CRK10 -----  
 CRK11 -----  
 CRK12 -----  
 CRK13 -----  
 CRK14 -----  
 CRK15 -----  
 CRK16 -----  
 CRK17 -----  
 CRK18 -----  
 CRK19 -----  
 CRK20 -----  
 CRK21 -----  
 CRK22 -----  
 CRK23 -----  
 CRK24 -----  
 CRK25 -----  
 CRK26 -----  
 CRK27 -----  
 CRK28 -----  
 CRK29 -----  
 CRK30 -----  
 CRK31 -----  
 CRK32 -----  
 CRK33 -----  
 CRK34 -----  
 CRK35 -----  
 CRK36 -----  
 CRK37 -----  
 CRK38 -----  
 CRK39 -----  
 CRK40 -----  
 CRK41 -----  
 CRK42 -----  
 CRK43 -----  
 CRK44 -----  
 CRK45 -----  
 CRK46 -----

CRK1 -----MKKV-- 4

|       |                                                               |     |
|-------|---------------------------------------------------------------|-----|
| CRK2  | -----MKKV--                                                   | 4   |
| CRK3  | -----                                                         |     |
| CRK4  | -----MRGEREM-VTD-                                             | 10  |
| CRK5  | -----                                                         |     |
| CRK6  | -----MERTA--                                                  | 5   |
| CRK7  | -----                                                         |     |
| CRK8  | -----MAFKCQSNNYKYKC--                                         | 14  |
| CRK9  | TREAPVSGFHTLYCLAQCAPDLSRDDCRTLGDIAIKDIPNSPQCSGVRLLGGKVLHPSCN- | 239 |
| CRK10 | -----                                                         |     |
| CRK11 | -----MI-YQWL                                                  | 6   |
| CRK12 | -----M                                                        | 1   |
| CRK13 | -----MLQLKL--                                                 | 6   |
| CRK14 | -----MVQLKI--                                                 | 6   |
| CRK15 | -----MFELKL--                                                 | 6   |
| CRK16 | -----                                                         |     |
| CRK17 | -----                                                         |     |
| CRK18 | -----                                                         |     |
| CRK19 | -----                                                         |     |
| CRK20 | -----                                                         |     |
| CRK21 | -----MIT-                                                     | 3   |
| CRK22 | -----M-CIL-                                                   | 4   |
| CRK23 | -----M-FIL-                                                   | 4   |
| CRK24 | -----M-LVS-                                                   | 4   |
| CRK25 | -----MFSRNM                                                   | 6   |
| CRK26 | -----M                                                        | 1   |
| CRK27 | -----                                                         |     |
| CRK28 | -----MIIRKASVNVVP-YPD-                                        | 15  |
| CRK29 | -----                                                         |     |
| CRK30 | -----M-AII-                                                   | 4   |
| CRK31 | -----                                                         |     |
| CRK32 | -----                                                         |     |
| CRK33 | -----                                                         |     |
| CRK34 | -----                                                         |     |
| CRK35 | -----                                                         |     |
| CRK36 | -----                                                         |     |
| CRK37 | -----                                                         |     |
| CRK38 | -----MPSNN-                                                   | 5   |
| CRK39 | -----                                                         |     |
| CRK40 | -----                                                         |     |
| CRK41 | -----MNT-----KS--                                             | 5   |
| CRK42 | -----MH-APWF                                                  | 6   |
| CRK43 | -----M-VGTQ                                                   | 5   |
| CRK44 | -----                                                         |     |
| CRK45 | -----MGM-KTTK                                                 | 7   |
| CRK46 | -----M-EGKQ                                                   | 5   |

|       |                                                               |     |
|-------|---------------------------------------------------------------|-----|
| CRK1  | ---VYL---VFLCNLSLLIKLLLLSKTV-----IAEPRAKTVLITCGHVR--EHN---TT  | 48  |
| CRK2  | ---VSL---VFLCNLSLLIKLLLLSKTV-----IAEPRDKTVLVTCGHVP--GHN---NT  | 48  |
| CRK3  | -----MSLASFLLVFLCCGALPA-----LADPRATELAVMCTNTT--AP-MLQRQ       | 42  |
| CRK4  | VSMASL---KLLLLLFILSFLHFN--T-CKAQELNSDPVYL-YHNCSGGN-----TTANS  | 58  |
| CRK5  | -----M---IPSSVSFLLFLSVFAPLT-----LSDPRAQRAALLCTNRS--VSSLSRRQ   | 45  |
| CRK6  | ---PVV---YFQCFIFLLMKAVLLSKTV-----VAEPRAKTVNITCSQKL--EHN---YT  | 49  |
| CRK7  | -----MLLSSSLIPRAV-----CSGTGIRETGFTCGGSE--NPG---S-             | 34  |
| CRK8  | ---KKS---SFEVVIITVATLLCFSHSA-----LSDPRISEVGFCGTQK--ASP---SG   | 58  |
| CRK9  | IRYESY-PFYRVPTNPSPKLVLESKTSRHADLTFSKDPFYVSHNCSTN-----ETLTSNN  | 294 |
| CRK10 | MATRIPRFVGGF-----MT--LFTMA-----SAQSLNYV-NDDCHNST--TKEQAITL    | 43  |
| CRK11 | FIIKLVI-----LV--CFVAG--QNSSNSQPLDY-RYACLDQS--S--VPPSA         | 45  |
| CRK12 | VSVIRLKLISIL-MFYLLGTLNVL--P-----TETASTFR-HYDCTNK---AKFSPKS    | 47  |
| CRK13 | ---LV-----LTLIWWSYNNFHAYGA-----VENSQTNLLNKGCSAYN--ASN---LR    | 46  |
| CRK14 | ---QEL---TLLVLCSSWWSL-----EGT-----VGDPQIFFLKWDCSGFT--APN---LS | 45  |
| CRK15 | ---IV-----LTMMLWSN--IVEHGA-----TGDPQTRMINSGCSTYN--ATN---LQ    | 44  |
| CRK16 | ---MGAV---SCMLL--FFLCGV-----L-SQA---NAQYL-FQSCDN--S-NGNYTANS  | 39  |
| CRK17 | --MASF---NFFILHLTFSLFLHCSPSPITQG-ALDGASKAYNCTRN---STFASYSV    | 51  |
| CRK18 | --MAWY-LKYVIPLIFSITL--NFTATRA-----QGLSYQYQVCSTN-----KFTPN     | 44  |
| CRK19 | --MASC-FTYAIPFIFF-ISL--CFTPTRA-----QGLQYQYQVCSPN-----KFTPN    | 43  |
| CRK20 | -----MSLLVYVFFLGFFNF SITEA-----TEIYYLNHSCSSN---KTFTPN         | 41  |
| CRK21 | KS-----KNNLKLFLFCTLVLT--V-----TETSASVFN-NVSCSTN---HTFTPN      | 44  |
| CRK22 | KSCSTQ---LLIL--SLFVFLNFA-----SEAA-TYS-SHVCT-D--GSFYRPNT       | 44  |
| CRK23 | KSCSTH---LLIL--SLFVFLNFA-----SEAAPTY-S-RHACTND--GSFYRPNT      | 46  |
| CRK24 | NFCATS---LTLQSLCLLMLFHA-----TASPPVYS-AHFCSQNSDQNSYASDT        | 51  |
| CRK25 | FLSISNNLVTFLFLSLFIE-----PFCSSGAPVY---NYCPSNA---SYNSS-V        | 50  |
| CRK26 | IIFNSNCFISFLL-LSLLGSL-----TPLTSATPKYN-DIYCPKNA---SYQSNTT      | 47  |
| CRK27 | -----MPI-FLFIFLQLI---S-I-SQC-NAQPVFVH-LHQCM--NH-KGNYTANS      | 39  |

CRK28 YGMGAV---SCMLL-FFLCCL-----I-SQA---NAQYL-FQSCDN--S-NGNYTANS 56  
 CRK29 ---MAV---SFTLL-LFLSFSFL-----I-SLG---SA--Q-KYICDN--R-SGNYTANS 38  
 CRK30 IPMAAI---SCILS-LLL---SS--L-I-SQV---SAQFN-TEYCDN--N-KGNYTINS 45  
 CRK31 --MAAV---SYMLI-LFLSFPFLK--F-I-SLG---SA--Q-KILCDD--G-HGNYTANS 41  
 CRK32 --MAAL---SFMLI-LFFSFPFL-----V-SLG---SA--Q-KYVCDK---GGNYTANS 38  
 CRK33 --MAAL---SFMLI-LFLSFTFLK--F-I-SLG---SA--Q-NVICDD--G-HGNYTANS 41  
 CRK34 --MASV---SFTLF-SFLRCLCVI--V-I-LA-----QSSA-QTPCDN--T-KGNYTINS 41  
 CRK35 -----MTAI-FFLFCLCVT--I-I-ISQ-----G-TAFCDN--S-KGNYTVNS 34  
 CRK36 --MPLL---LPRLL-FFLWCLPIT--F-FISQVSAVNNTQNFHYFCDDTND-QGNYTTNS 50  
 CRK37 --MPLL---LPRLL-FFLWCLPIT--F-FISQVSAVNNTQNFHYFCDDTND-QGNYTTNS 50  
 CRK38 LIFRIFCCILVIT-----FFNFPTTKA---QNEDRVYFEHQNCASAN----I--SLPS 48  
 CRK39 MAMATI---SSTLL-FFLFWLHAI--M-T-ACETTFGPDFGTSKFCD---S-SMNYTANS 48  
 CRK40 MAMATI---SSTLL-FFLFWLHVI--M-T-ACEDSFGPDFGASKICI---S-SMNYTANS 48  
 CRK41 ---ITS---NPP-WILFTTLFSLSSFSLS-----LSDPRITEAGLYCGTTK--APL---KA 48  
 CRK42 LTVRSM-CFGFLL---CLFSF--CLSYT-----QAQTPYQ-GSYCQNST--Q--ESLTT 50  
 CRK43 GNVRSI-CFSFLL---LLSFR--SFST-----KTKADTYL-GSNCNNTT--Q--QTLSS 48  
 CRK44 -MIPIRVSVSFL-----FL--LFTTT-----RAQAPIYM-YNFCENST--S----VSP 38  
 CRK45 MMIPIRVVLFSM-----LL--LFITA-----SAQVPIYM-NNFCDNST--S----VSP 46  
 CRK46 LNVRSIYSFIFLF---LLSFK---PLVT-----EAQSPNYV-GDDCNSTT--T--TSLSS 49

\*

CRK1 IFVFNFAVATMDKISDEMRTK---GFGTAVVG---T--GPDTNYGLAQCYGDLSLLDCVLC 100  
 CRK2 IFVFNFAVATMDKISDEMRTK---GFGTAVVG---T--GPDTNYGLAQCYGDLSLLDCVLC 100  
 CRK3 AFLTNFYDAMEALDITLTSQ---RYALVVKG---TT-QNETVYAFGECKMDLSKPDCCDVC 95  
 CRK4 AYQNLNLGTLTSLSSNAS---EFSNNTVG---TSSSDRVYGLFMCRGDVPSTLCHQC 110  
 CRK5 VFISNFLEAMDALPLTTTR---QRGAVVKG---S--GNVTVYAMGECKMDLSQSDCNVC 97  
 CRK6 IFVFNFAVATMEKISEQMSST---GYGTAVEG---TG-GPDTNYGLAQCYGDLSPLDCVLC 102  
 CRK7 -SASRFMALMDTSLFQVKER---GWGAQT-----LLGSGPPMYALGQCRDLRSTDCYKC 85  
 CRK8 NYFPIFTKEMEKLHELKKN---NWGTHSEG---LS-SATPIYALVQCQDLSNLDCLQC 111  
 CRK9 TLQISLTLTFSYLSSKATN---KRY---KADVNSTVYGLFMCRGDVPNDVCEKC 343  
 CRK10 AFRNLNLSTLSSDAAT---SKGYNHTTNGSTPVDDDAVYGLYDCRGDVTGPFQCF 101  
 CRK11 AYKTNINNLFTSLSSDSAT---SNGFGN-----GTSGIDQDMVYGLYLCRGDVNTSLCHSC 98  
 CRK12 SYQFNLNKLLSKLTSKINI--T-NYNTTVS---GTNKRDIYGLFMCNGYM--EKCGEC 99  
 CRK13 SFFANMNETFESLRAQISNDKNRHFAVED-----KARGEVLTYAMFQCRNYLSKTECLAC 101  
 CRK14 NFQNLNLASLLDITLQVSI---SKHFATAK-----ATSGTDPVYAMFQCRNYLSITDCATC 99  
 CRK15 SFHANINATFSELRGDIIND-SKHFGTTQ-----QATGDVLTVMFQCRNYLSNNDCLSC 98  
 CRK16 TYNTNLITLTLSSNTEI---NYGFYNFSH-----GQNADKVNAIGLCRGDVEPNECRSC 92  
 CRK17 AYRSNVKTLTLDWLSNVNTN---NARFYNTTVA---SRHAADTAYGSFLCT--INPEICQRC 104  
 CRK18 TFQRLTLTFLSSLSSTASS--NVEFFNNTVTA--GTNSSDTVYGLFCLRGDIPSDLCNHC 100  
 CRK19 TFQSHLTTLFSSLSKASN---NVQFFNNTVT---GTNPSDTVYGLFMCRGDIPSDLCNHC 98  
 CRK20 AYEFTNLRLTLTSLSSHATP---AQFF-N-TTGT---GGDGSEI IYASFMCRGDVSNRTCQEC 95  
 CRK21 TFNANLNTLLSYLSSNVNTN---DTRFFNT-TS---GEDSDTVYGLYMCRGDVPFALCREC 97  
 CRK22 TFQNLNLTLSSLSVSNATQ---HDGFYRTKIS---LGAPGEIKGLFCLRGDVTSPVCHDC 98  
 CRK23 TFQNLNLTLSSLSVSNATL---HDGYLTNIS---LGAPGEVKGFLFCLRGDVTSPVCHHC 100  
 CRK24 KFMSNLNTLLSSLSVSNSSLPNNNGFLRTSVA---KGTDDIDGRFLCRGDVNETVCHSC 107  
 CRK25 TFETNLRLVLESLSVSNISQ---SDGSYSSAM---GLGTASVASGYFLCRGDVSLTTCND 104  
 CRK26 TFQNLNLTLSSLSVSNATQ---GVSYTTM---GFGSTNAVNGFLCRADLFSATSND 101  
 CRK27 TYHNNLNTLLSSNNTDI---DYGFYNFSY-----GQESDRVNAIGLCRGDAKPDACRMC 92  
 CRK28 TYNTNLITLTLSSNTEI---NYGFYNFSH-----GQNADKVNAIGLCRGDVEPNECRSC 109  
 CRK29 IYSTNLNTLLSTLSSNTQI---HYGFYNFSY-----GQNTDTVYAIIGLCRGDVEPEECRSC 91  
 CRK30 TYHNNLNTLLSTLSSNTQI---NYGFYNFSH-----GQNNDKVNAIGLCRGDVKPDCCRSC 98  
 CRK31 TYSTNLNTLLSTLSSNTQI---EYGFYNFSY-----GQNTDTVYAIIGLCRGDQQPEECRSC 94  
 CRK32 TYSTNLNTLLSTLSSNTQI---EYGFYNFSY-----GQNTDTVYAIIGLCRGDQQPEECRSC 91  
 CRK33 TYSTNLNTLLSTLSSNTQI---EYGFYNFSY-----GQNTDTVYAIIGLCRGDQQPEECRSC 94  
 CRK34 TYHNNLNTLLSSFSSTQI---NYGFYNFSY-----GQGEDKVYAIIGLCRGDLKPDCECLK 94  
 CRK35 TYNNLNTLLSSFTSHDQI---NYGFYNFSH-----GQGTDKAYAIIGVCRGDRTRDQCLK 87  
 CRK36 TYHTNLNTLLSTLISNTEI---DYGFYNFTN-----GESTDKVYAIIGLCRGDIKPNECRRC 103  
 CRK37 TYHTNLNTLLSTLISNTEI---DYGFYNFTN-----GENTDKVYAIIGLCRGDIKPNECRRC 103  
 CRK38 TYQNLNLTLFSSFTSNASA--KLFI-NTTIL-----GGNSSVYGMFMCRGDIPRLCKQC 100  
 CRK39 TFSNLHTLTLSTLTSHEI---NYGFYNFSH-----GQNSDKVYAIIGLCRGDLKVDECRSC 101  
 CRK40 TFNTNLHTLTLSTLTSHEI---NYGFYNFSH-----GQNSDKVYAIIGLCRGDLKVDECRSC 101  
 CRK41 NYIPSFTEKEMESISQLVTNH---NWGTHVVN---ISGSSIPYIYGAQCFKDLSTNDCLLC 102  
 CRK42 AYQTNLERILSWMSSDAAT---SKGYNYSIGNS-----STVYGLYNCRGNVVGFCQFC 102  
 CRK43 AYQTNLDRILTWMPSDAAT---SNGYNQTSIGTN-----SSVYGLYDCGGDAVGYFCQFC 100  
 CRK44 SYKANVDTLTSLSWVTDSQ---SDGYNNTTVNNN---NDDDAVYGLYSCRYDITGYFCRFC 93  
 CRK45 SYKANVDTLTSLSWVTDSYK---GDGYNNTTVNNNNNDDDAVYGLYSCRYDITGYFCQFC 104  
 CRK46 AYKANLNSVLSWLSDAAT---SKGYNHNSFGNN--TPGADAAVYGLYDCRGDVSIGYFCQFC 106

\*

CRK1 YAEARTVLP---QCPYN---SGRIFL--DGCFMRAENYSFFNEYT-G--PG-DKAVCG 147  
 CRK2 YAEARTVLP---QCPYN---SGRIFL--DGCFMRAENYSFFNEYT-G--PG-DKAVCG 147  
 CRK3 FAQCKTRVL---RCSPPFQRTNGMFFF--DGCYLRDYGYNFFNESL-S--PR-DRTICG 146  
 CRK4 VLNATRRLR---SDCSLAK---QAVIY--DECTVRYSNISFFSTVATR--PRVGLLNTG 160  
 CRK5 LAQCKTQLL---ACLPFQRTQGGRLFF--DGCYLRDYGYNFFAESF-G--DQ-DTTVCG 148

```

CRK6  YAEARTVLP---QCFFHN---GGRIYL--DGCFFMRAENYSFYDEYT-G--PG-DKAVCG 149
CRK7  FSQARQVLS---RCVPKT----AGTIYL--DGCFRLRYDNYSFIRESV-D--PTRDIGICM 133
CRK8  FATSRTKLP---RCLPSV----SAHIYL--DGCFRLRYDNYSFYSEDT-D--PLRDTVNCT 159
CRK9  VQNAAHRIA--LDCNSSQ----EAIWVY--SQCMRLYSFRKIFRTVERS-----PVFSDL 390
CRK10 VSTAASEIL--QPCPNRS----SAVIWY--NYCILRYSNNNFFGNLTTT--PSWEIVEAK 151
CRK11 VQSSSILVM--QHCPNNA----SAILWY--PFCLVRYSNQNFFGNLTIR--PRIPMFAT 148
CRK12 VSTSIQTLK--SKCVFNK----EAIWT--HECLVRYSDKFFPNTPEKW--PSRCVRKSE 149
CRK13 FNTATSQIR--NCSA----ANGARIY--DSCFLRYESDRFYDET-N-E--PG-GGVSCG 148
CRK14 LATAAAKIR--NCST---GVNGARVIY--DGCFRLRYESNDFFDQIM-P---R-SSILCG 146
CRK15 FNTASTQIR--NCSA----ANGARVIY--DGCFRLRYESERFFDQTN-E--VG-NGVSCG 145
CRK16 LKDAGGNIT--QLCPNQK----EATIIY--DNCLLRYSNHSIFGVLDIS--PDFYMANPN 142
CRK17 VKEAAKLLS--SLCTIAK----EAIWY--EVCYVRYSDRRFFSTVEVS--PKLSFMNDQ 154
CRK18 VGNATQRLSTHADCTLSK---AAVVY--DECIVRYSNRSFFSTLT--MQAGYALWNP 152
CRK19 VGNATQRLSTHWDSCFSI---EAVVY--DECIVRYSNLSFFGTADMEINSGYVLASPI 152
CRK20 VRTAAEQIS--RVCPIK----EALIWY--HECLVRYSNRCFFSTLEEWPFRNFMSGHVT 147
CRK21 VGFATQTIA--SSCPTSK----EAVIWY--NECLLRYSYRFFFSKMEEW--PRHQVNIPL 147
CRK22 VTAAAKNIT--QRCNTQT---ESIWIY--DECMRLRYSNSSVL-N-NIV--PGVNLNVE 146
CRK23 VAAAADNIT--RLCTNQT---ESVIWY--DECMVRYSNLSFL-N-NIV--PSIDYSEQ 148
CRK24 IAAAAANIT--RLCPNNT---ESIWIY--DECTLIYSNSTFQYD-NMV--PKFTLNDEG 156
CRK25 ITTAAAEIT--QLCPNKT---ESIWIY--DECTLRFTNRYFSPA-ATE--PGASLSNNK 153
CRK26 VATAVTEIR--RRCPNQT---ESIWIY--DECMVRYTDRYFSP-SV--PRANLWDDK 150
CRK27 LSDSKVLLT--QLCPNQK----EAILWY--DYCMLRYSNRSIFKTMEAT--PGFS-KRTY 141
CRK28 LKDAGGNIT--ELCPNRK----EASIYN--DHCMRLRYSNRSIFGVLDIS--PDFSAYNTA 159
CRK29 LNNSRIYLS--HRCPNQK----KAIMWS--GDCMLRYSNDTIFLKMETS--PTYWWNVG 141
CRK30 LNSALTIT--QLCPNQK----EALLWLNTSKCLLRYSHRTIFGVMESS--PGFYLTNVN 150
CRK31 LNNSRVDLT--ERCPNQK----KAIMWS--DQCMRLRYSNYTFHQMETS--PRYMMWNTA 144
CRK32 LNNSRVDLT--QLCPNQK----KAIMWS--SECMLRYSNDTIFNQKET--PRYWWNTA 141
CRK33 LNNSRVDIT--ERCPNQK----KAILWS--DQCMRLRYSNDTIFNQMEIS--PTYMMWNQP 144
CRK34 LNSRVSLA--ERCPNQK----EAIWWT--VECMLRYTNRSIFGVMENQ--PTNNNYNL 144
CRK35 LNSRAALS--KECPNQK----EAIWGT--GECSLRYSNRSIFGLMENQ--PTLELLYTL 137
CRK36 LNSRANLT--ELCPNRK----EVIGWYEDERCMRLRYSDRSIFGLMETG-KPAYFAWNLG 156
CRK37 LNSRANLT--ELCPNRK----EVIGWYEDKCMRLRYSNRSIFGLMETG-KPAYFVWNSD 156
CRK38 VGNATQKSLSTDPECNQSI---EGFMWY--AECMLRYSNVSFFSIVAT--SPEYALFNNN 152
CRK39 INSSQANLR--QLCPNQK----EAIKWE--EKCMRLRYSNRPIFTMETS--PPYTNND 151
CRK40 LNSSQANLR--QLCPNQK----EAIKWE--EKCMRLRYSNRPIFTMTDS--PPYMHNTY 151
CRK41 YAASRTKLP---RCLPSV----SARIYL--DGCFRLRYDNYSFYAEVS-D--PLRDTLNCT 150
CRK42 VSNAAREVR--QHCPNRV----SATVMY--DFCILRYSNENFFGKILTY--PTWHAVGTK 152
CRK43 ISTAVREAP--QLCSNRV---SAVVWN--DYCVIRYSNEDFFGKALTD--PTWHTFGTK 150
CRK44 ITTAAEELS--RRCPNV---RAIIWY--DICIIRYSNQSFNGKVSLT--PTWNITGPK 143
CRK45 ITTASKELS--QRCPNTV---RGIWIY--DVCIIIRYSNQNFIGKVSLT--PIWNTTGTR 154
CRK46 VSTASREVL--QRCNRV---SAIIWY--DFCILRYSNENFFGNVTVD--PSWNHSGPK 156

```

. \* \* :

```

CRK1  N-MTKKNS-----SFQAAAKEAVSRAVQ-DAP----NNKGYARGNVAVEGATN 189
CRK2  N-MTKKNS-----SFQAAAKQAVSRAVQ-DAP----NNKGYARGNVAVEGATN 189
CRK3  T-EDFRG-----NWSVFKANTVELVRNLSIE-TP----KNEGFSAGYVR--RSN 187
CRK4  N-IS-----NPEAFMTLLFSTINTTAD-EAANFHMGVKKYATNQA--NFSGF 203
CRK5  T-NVSSKNSNNISDGAHSSGIYKANALELVRNLSEV-AP----KNDGFWGVSVE--KKN 199
CRK6  N-TTKKNT-----SFQAAAKKAVMTAVQ-TAP----NNKGYARAEEVAVEGTAN 191
CRK7  T-PTLGD-----DGG-----KRVAEMVSNVT--EA----AERGFAVDGE----- 166
CRK8  T-EYGGV-----AGEAERLVFGNSVGKVVENVVRVAGN---EGRGFVAVGEG----- 201
CRK9  N-ITSR-----NEEQSFFSVTLAKTLDKVAVMAGDSDERFGKYST--KLNDK 434
CRK10 NS-T-----DPEELQ-KAESYMQSLKREATVE---SNKLYAMGGF--NLSDG 191
CRK11 QNFT-----SAGEYDSDAQVLMNGLIQ-IGSE---APLMFGTHMF--NINGT 189
CRK12 D--YEG-----ELDSFNKVLSSLMDLLTEA-NEAPMDSIKFAVKKI--TISED 193
CRK13 N-TSS-TVT-----GFRVAVQQV-LMELQEATP----KIKGFYAATKT--PVVGG 189
CRK14 N-QTANESP-----AFSAAGQQV-IKDLQRATP----KITAFYAATKT-QAVDG 188
CRK15 N-ITS-NAT-----GFISVGQQV-IWDIQRATP----KTKRFYAATKT-EVAGG 186
CRK16 N-AT-----EVVEFNRVLDLLKELKGKAASG--DSRRKYATDND--TTMNF 184
CRK17 DYV--G-----DVGFRFNNIVWMDLNLRLSEASASNKs----ADKSV--NITDN 195
CRK18 N-MTNQ-----ESFKRLLYDTMNKTADD-AAHFPTGAKKFATRET--SIDIF 195
CRK19 N-MTNQ-----ESFKRLVYVSLNETADE-AVSGSGGGEKFATKET--DIDIF 195
CRK20 N-SRNE-----KGSYGFWLLSKTSLSDAVGEAANAGPAGTMKFATKNA--TVFGS 193
CRK21 GDPVVL-----HSSGFYDALGSIFDELPNQAALALKGSNNPYAVKQE--NASAS 194
CRK22 S-VPDS-----DYLQFNNILASTLNDKQ-EAIS---SGKMFSTKEA--NVTSS 188
CRK23 S-VPDS-----ETTSFINFLASTLKGVQA-DAVNS-PSAKMFATREA--IFTSS 192
CRK24 S-IVNS-----NHDQFNQQLLSLLKGLLE-KASASSMGKKFAAGTV--SVTSA 201
CRK25 S-ISAS-----DLDSFNRTLFGLLDDLVEKTASS--NSARKFATGDR--EFAGS 197
CRK26 N-ISTS-----DWGSFNQTLSSLLSGLATKAAGS--QSASKFAIGEM--NFTAT 194
CRK27 N-AT-----DGDSFNEVLRNLLLENLTSQASTG--DSLRRKFAVANA--SGPAF 183
CRK28 N-AT-----EADFNRVLQNLRELKDKAASG--DSRRKYATDDN--TTSNF 201
CRK29 N-VTE-----VDQFNEVLGNLMTSLRDIAASG--DSRRKCAAGKN--ISGLNF 184
CRK30 N-VT-----EADKFNQALSNLNRNLTVVAASG--DSRLKYAADS--IAANF 192
CRK31 N-AT-----DATQFNEVLGNLMKSLKDTAASG--DSRRKYATAEN--ATGLNF 187

```

CRK32 K-VREV-----DVDQFNEVLGNLMKSLRDIAASG--DSRRKYAAGKN-TTGLNF 186  
 CRK33 N-AT-----DANQFNEVLGNLMKSLIDTAASG--DSRRKYATAEN-ATGLNF 187  
 CRK34 N-VT-G-----SVEQFNTALESLMRNLTRIAASG--DSRRKYATASA--YGSDF 187  
 CRK35 E-VR-G-----SVEQFNAAALQSLMRNLITQTAASG--DSRRKYATGSA--SAPDF 180  
 CRK36 N-AT-----QAEEFNKVLRDLLDGMRSSRAASG--DSQSKYATANA--TGPDD 198  
 CRK37 H-AT-----QAEEFNKVLRDLLDGMRSSRAASG--DSQSKYATAKA--TGPDD 198  
 CRK38 N-VSSN-----STISFMNFLRNTMNQT---AEAAADSEARFSTKEA--NLSRS 194  
 CRK39 N-AT-----KVDEFNKVLGGLLRNLREKAAGG--DSRRKYATDTA--FVDNF 193  
 CRK40 N-AT-----DVDEFNKVLGGLLRNLREKAAGG--DSRRKYATDTA--IVANF 193  
 CRK41 S-QHGTV-----VDKTERLEESVGRVSVTNRALA---KGGGFAVGEV----- 192  
 CRK42 NI-Y-----NKEETK-KGEDFMRGLIRKATVE---TNKLYYMDGF--NLSFT 192  
 CRK43 NI-S-----NTTEIQ-KGQDFVRSIRKATNE---TNQLYYKEGF--NLSAT 190  
 CRK44 KI-K-----DSAEAK-KVEDSMESLITKVTID---TKKFWAVDEF--DWVDN 183  
 CRK45 KI-K-----DSSEVK-KAEDSMQSLIRKATVE---SKTFWAVEEF--EWIDN 194  
 CRK46 NV-S-----SVEEIQ-KGEGFMRSLIRKATVE---TNQLYYMDGF--NLSST 196

CRK1 ---QSVYVLADCWRTLDKRSCACLENAFFSL--LGCLPWSEGRALNTGCFMRYSDKD-F 243  
 CRK2 ---QSVYVLADCWRTLDKRSCACLENAFFSL--LGCLPWSEGRALNTGCFMRYSDTD-F 243  
 CRK3 ---VTIYGLAQCKWFVNSSSCQNCLEAITRI--DSCAPKGEVRALNAGCYLRATHN-F 241  
 CRK4 ---QTLYCLAQCTPDLSPGDCRNCLSGVIGDL-PWCCQKGQGGRVLYPSCNVRYELYP-F 258  
 CRK5 ---VSVYGLAQCEWFVNGSACKCLADAATRI--ASCATQ-EGRALNAGCYLRFSAHK-F 252  
 CRK6 ---DSAYVLANCWRTSLDAKSCRALENASSSV--LGCLPWSEGRALNTGCFMRYSDSD-F 245  
 CRK7 ---EGVFALAQCWSTLNKGRCKICLTEAAKKV--QECVPNVEGRGLFTGCILRYSTRK-F 220  
 CRK8 ---EGVYALAQCWTVGGGKCRDCLKKAENEI--RGCLPKKEGRALNSGCYLYRSSDK-F 255  
 CRK9 ---QTLYTLAQCTKDLPTDDCKGCLGNLIGTEIPWSRLGSIIGRVLYPSCNLRFEFHQ-F 490  
 CRK10 ---EERYGLVQCSDRLTSPDNCECSQCLDAMIQKV-PQCCGKTRSWQVLAPSLIKYDDFM-F 246  
 CRK11 ---QRRYGVWQCSRDIPTPEECRTCLSNMLEDV-ENCCQEKKVVRVFPSCIVMYETQP-F 244  
 CRK12 ---QHLFGFAQCTPYLSKENCKKCLRDAMNFI--QTCARGKTGGRVIYPSCIVRYDHYL-F 248  
 CRK13 ---SAIYAVSQCVETAIKTNCLNCMQVAFNNL--QRCLPNTDGTAYDAGCFMRYSTTS-F 243  
 CRK14 ---AIYAIQAQCAETLSPDNCECSQCLDCLSVESSEI--QGCLPNTNARAFDAGCFMRYSETP-F 241  
 CRK15 ---SAIYAVAQCVETATEDKCLSCMQVGYNL--QSCLPKTEGRAYDAGCFMRYSTTP-F 240  
 CRK16 ---QTIYGLLQCSPDLTQDNCNDCLDEAITRI--PTCCDDRGRGVVGPSCNIRYENYR-F 239  
 CRK17 ---QKSYGHAWCLPYLTKECNSWCLSEAIADIPTGCCRGKSGGHVIFPSCGVRYELYP-F 251  
 CRK18 ---QKLYGLAQCTPDLSTPDNCECSQCLDCLSVESSEI--QGCLPNTNARAFDAGCFMRYSETP-F 241  
 CRK19 ---QKLYCLVQCTPDLSPRDCRCLNSLINSDLPRCCAGRQGGRVLYPNCVIRFEIYP-F 251  
 CRK20 ---QKIHTLVQCTPDLSSDDCSNCLGDIMR-DIPLCCLGRIGGMVLYPSCITLMFGRH-F 248  
 CRK21 ---ITVYGLAQCTPDLVAGDCRRCIADAAAEFAVSCCGSIGASILFPSCIVRYETYP-F 250  
 CRK22 ---MKIYTLAQCTPDLSTPDNCECSQCLDCLSVESSEI--QGCLPNTNARAFDAGCFMRYSETP-F 241  
 CRK23 ---MTLYSLAQCRPDLSAFDCNMCITGAISSL-G---EGKRGARNLLPSCNVRYELYP-F 244  
 CRK24 ---QTLYGLAQCEPDATSGSCAACFENAISSI--PSCCNGSGGARLLLPICSIYQLYP-F 256  
 CRK25 SSQRTVYSLTECEPTLTSTECEECQLNAISTL--PSCCEGKQGARALLAWCNVRYELFQ-F 255  
 CRK26 ---SRVYGLAQCSAGMTNAQCEACLNVNASITL-GTCCQKGQGARALLAWCDIRYDLYQ-F 249  
 CRK27 ---QTIYGLVQCTPDLSEKHCDDECLKTISEI-PQCCNGSKGAKFFKPSCIIRYEIYP-F 238  
 CRK28 ---QAIYGLVQCTPDLTQDNCNDCLDEAIKQI--PTCCDEKRGGRVVGPSCNIRYEDYR-F 256  
 CRK29 ---QTIYGVVQCTPNLSQQEYQCLDVAISEI-PNCCSGKIGGRVLKPSCNIRFEIYS-F 239  
 CRK30 ---QTVYGLVQCTPDLSETDCNRCLDGAISEI-PSCCGNKMGGRVLRPSCNIRFESAI-F 247  
 CRK31 ---QTIYGLVQCTPDLSSQEQCTQCLDGVISEI-PTCCNGKVGGRVLRPSCNIRFETYS-F 242  
 CRK32 ---QNIYGVVQCTPDLSSQDCYQCLDGAISEI-PNCCNGKIGGRVLKPSCNLRFESNS-F 241  
 CRK33 ---QTIYGLVQCTPDLSSQEQCTQCLDVAISEI-PNCCNGKIGGRVLRPSCNIRFQTNF-F 242  
 CRK34 ---QTIYGLAQCTPDLSSDDCKCLDEAISEI-PQCCSGKAGGNVVKPSCRIRFDYPF-F 242  
 CRK35 ---QTIYGLVQCTPDLSSDDCKCLNEAISKI-PECCNGKAGGNVVKPSCRIRFDYPF-F 242  
 CRK36 ---KTIYGLAQCTPDLSEQDCNCLIQSMEEF-GNCCDSKIGARVVRPSCNLRYESFPP-F 254  
 CRK37 ---KTIYGLAQCTPDLSEQDCNCLIQSMEEF-GNCCDSKIGARVVRPSCNLRYESLQF-F 254  
 CRK38 ---QTLYALAQCTQDLSPQNCRTCLAEGIK-ILPTCCDGKQGARVIFPSCNIWYEMYP-F 249  
 CRK39 ---QPIHGLMQCTPDLSPQDCGDCLDWSISAI-PTFAKDKVGALVLLPSCNLRFEIYN-F 248  
 CRK40 ---QPIHGLMQCTPDLSPQDCGDCLDWSISAI-PTFAKDKVGALVLLPSCNLRFEIYN-F 248  
 CRK41 ---EGVYALAQCWNTIGSDGCRECLRKAGKEV--RGCLPKRDGRALNAGCYLYSTNK-F 246  
 CRK42 ---QERYGVVQCSRDLTNGGCRECLEAMLAEV-PKFYEQLGWSIWSGTCMIKYDDYM-F 247  
 CRK43 ---ESRYGVVQCSRDLTNEVCRQCLEDLAEV-PKCCEQKVAMVWSGSCLIKYDDYM-F 245  
 CRK44 ---EKRYGVVQCDRDIPECEGCECLHVLDDIF-PQCCSTNAQWAVFGPSCGMRMDDEK-F 238  
 CRK45 ---EKRYGVVQCDRDIPECEGCECLHVLDDIF-PQCCSTNAQWAVFGPSCGMRMDDEK-F 238  
 CRK46 ---QRRYGMVQCSRDLTNEGSCQCLEAMLAEV-PKCCEHKLGWQVSTASCLIKYDDYI-F 251

\* \* \* : \* :

CRK1 LNKEQETGSSR-----GN---VAVIVVVVSS 267  
 CRK2 LDKEQETGSSR-----GN---VVVIVVAVSS 267  
 CRK3 YNNSNNNPPQE-----HRGHKNFAIIVAA-SSA 268  
 CRK4 YRATATPSPSPSPSPPLPPPTSG-----NSRGGGGISA-GTIVAIV-VPI 302  
 CRK5 YNNSTDVAISG-----NHGQRSKILAA-TTA 279  
 CRK6 LNKEEKKGRSG-----DN---VLVIVITVSS 269  
 CRK7 YNDVALPNINN-----STEERPQVWMIVACVLS 248  
 CRK8 YNQGGEDGED-----DSSRK-RIITAVSVLA 282  
 CRK9 YFDDPSAGPIQ-----SENKGINVR-KIVIVVI-VP- 519

|       |                                                           |     |
|-------|-----------------------------------------------------------|-----|
| CRK10 | YQITDQTS-SPLNPAAK-----G-GSIGS-KTLLIIT-VSV                 | 279 |
| CRK11 | FSNGTDSAPAPQQDNEAT-----DGNSRRW-WVIVIIA-VAG                | 279 |
| CRK12 | FPLPR-----GKRKNLG-VIASIIF-FHA                             | 270 |
| CRK13 | FADNQITIDIAPFL-----KQGS-RK-KWGIISGVVG                     | 270 |
| CRK14 | FADNQITVDISPF-----KQGRSSSK-KWVIIGCVVG                     | 272 |
| CRK15 | FADNQITIDIAPFL-----KQGDS-SK-KWAIIGGSVG                    | 270 |
| CRK16 | YEQTTIIDPE---TPPPSTIN-----TSPESSNTT-IIVIAVI-VPA           | 27  |
| CRK17 | RNAHVNSGWNVSPPPLDSPPPF---ASSGKRKQKT-LTIIVTV-VPI           | 293 |
| CRK18 | FRSLPTAPTPSPAGLVPPT-----NSGENKRS-RTIILIV-VPI              | 288 |
| CRK19 | FRSHGSAPTPTPPKL-----GEKKSSTS-RTIILVV-VP                   | 283 |
| CRK20 | YRDVNAIQESKPSGIKM-----SPG-S-----IPTV-VI                   | 276 |
| CRK21 | YQHSGSTAPTM-----I-----KSGSNIGT-EVIVIVV-VLV                | 280 |
| CRK22 | YNVSSVSTQ----PEFF-SPSS-----GKGRI-SLIVAIV-VPI              | 275 |
| CRK23 | YNVSAESAK----PESL-SPSS-----GKSSI-SIIVAIA-VPI              | 276 |
| CRK24 | LYNST-----AMIL-IPSS-----GSKSI-LMVVAIV-IPI                 | 284 |
| CRK25 | YNTSATSPSSG-----SNNNV-RVLVIVA-LVI                         | 283 |
| CRK26 | YNTSIASSVPSPPPPPSE-----KKSGSQ-RTIIVV-VAV                  | 285 |
| CRK27 | YDPINAATTHASPPPLQAS-----TKGKIIVS-GSVIAIA-VTI              | 276 |
| CRK28 | YEQTTIIDPE---TPPPSTIN-----TSPESSNTT-IIVIAII-VPA           | 294 |
| CRK29 | YGNTTTLDP-EAPPPSTNTS-----SINTSSQESDNT-IIVIAV-VPT          | 283 |
| CRK30 | YDQTPKLDPDVTPSPPPSSFT-----NTSPKESNTT-IIVIAVV-VSI          | 290 |
| CRK31 | YGATTTLDPDPEAPPPSTNT-----TSSQESDNT-IIVIAVV-VPT            | 282 |
| CRK32 | YENTTTLDPDPEAPPPSTNTSSTNNTSSTNNTSSTNTSSQESDNT-IIVIAVV-VPT | 299 |
| CRK33 | YGNPTTLLDDEAPPPSTNT-----TSSQESDNT-IIAIAVV-VPT             | 282 |
| CRK34 | YGPTLNILIDAPP-SPSTNNT-----SSSQGSNTS-RTIIAIV-VSV           | 282 |
| CRK35 | YGPTLKLDPDAPPSRLTNNTS-----LHLQGSKTS-RTIILIA-VPV           | 277 |
| CRK36 | YGA-PAYTPSPSLSPS-----NTSSEGSNT-IIAIATA-VPV                | 291 |
| CRK37 | YGA-AAYTP-----S-----NTSSEGSNT-IIAIATA-VPA                 | 284 |
| CRK38 | YGLVDNIPPK---TLVPSPGF-----SSSSSSSYQT-RTIILIL-ISI          | 289 |
| CRK39 | YNSTVILDPPLPP---ASLP-----LHQEDHGNSL-RTAIIIV-VPT           | 285 |
| CRK40 | YNSTAILDPPLPPALPPAPLS-----LHQEDHGNSL-RTAIIIV-VPT          | 282 |
| CRK41 | YNEDGDAGGKN-----GFLRR-GVITAEV-LAA                         | 279 |
| CRK42 | YL-----PETD-----KDGVNKR-SKLIIS-FSV                        | 270 |
| CRK43 | YLLNNDTTPAPAAPNQTD-----KQGVNNR-SRILIII-FSV                | 280 |
| CRK44 | YQSSG-----NGGAS-K-TRKLIIS-SSV                             | 259 |
| CRK45 | YQNSG-----NGGISSK-SRKLIIIS-FSV                            | 271 |
| CRK46 | YLFHNPPASSVSPDQIA-----KQSGSK-AKLIIG-LSV                   | 286 |

CRK36 VVIVSAVL--IFIYI RLKARKSG-----KKFETKQE-----E-LYDDDDDD-GIDASE 335  
 CRK37 IVIVSAVV--IFIYI RLIAKRSW-----KKFETKQE-----EEELYDDDD-GIDASE 329  
 CRK38 IILLGLLF--G-ICYSLMRRKTK-----KSNKVIL-----RENFLG-GSSTIE 328  
 CRK39 VIVVLVLL--IVIGRYLRK-AR-----KNLL-----AEDGDDD-EIEMVE 323  
 CRK40 VIVVLVLL--IVIGRYLRK-AR-----QNLL-----AEDGDDD-EIGMVE 327  
 CRK41 -AAVLMLI--LSASYVAF TKLTR- IKKENNNLGHIS-----SSISKS 310  
 CRK42 MGSITLLCLG--VYFFWNRR-----DGIRLSSFH--KIQTTEE 304  
 CRK43 IGAIIVLCFS--LYCFWYRKRVR-----KGNHEEKTRDGVREEELPLPSFH--KIQWEE 330  
 CRK44 LGSVALLCFS--VYCFWYRKRVR-----KDKMT-----FDEE 289  
 CRK45 LGAIALLCFS--VYCFWYRKRVR-----KDKMM-----LDEE 301  
 CRK46 LGAVALLCFS--VYCFWFRKRTR-----SGRKT---GGRIPDTIRLSSYH--NVQTDE 332

CRK1 SLNFK-----YSTLDKATGSFHENNKLGQGGFGTVYKGVLDAGREIAIKRLYFNRRQ-RA 361  
 CRK2 SLNFK-----YSTLDKATGSFHENNKLGQGGFGTVYRGVLDAGREIAIKRLYFNRRH-RA 361  
 CRK3 KLNMP-----YEILEKATDYFSDSNKVGEGSGSVFKGVLDPDGTAVKRLTFNTSQ-WA 361  
 CRK4 SLQFG-----FGTIEAATNNSADNKLGEFGFGEVFKGTLPSGQVIIVKRLSKSSGQ-GG 393  
 CRK5 RLNIS-----YEILEKATDYFNDSNKLQGGSGSVYKGVMPDGTITVAIKRLRFNTTQ-WV 372  
 CRK6 SLNFK-----YSTLEKATNFSFEDNKLQGGFGFVYKGVLPDGRQIAIKRLYFNRRH-RA 363  
 CRK7 GFSFR-----YDLLEKATDHFDPANKLGQGEAASVFKGTLPSGGTVAVKRLFFNKRQ-WT 341  
 CRK8 SLNYK-----YEILEKATDYFSSPRKLQGGGAGSVFKGTLPNGKDVAVKRLVFNNRQ-WV 370  
 CRK9 PLHFN-----LTAIELATNNSNDNKIGRGGFGEVYKGIILDRQIAVKRLSKSSKQ-GV 612  
 CRK10 PLNVDLPTIPLIWLQATNNSFSEFSKLGEFGFSGVHKGNLEDGTEVAVKRLSKASGQ-GL 380  
 CRK11 SMNTDFPMMPLSTILKCTNNFSEEQKLKGKGGFVYKGTLPDGRQIAVKRLSKTSVQ-GG 381  
 CRK12 SLQFE-----LRTIQEATNKFSDDNKIGEGGFGAVYKGGFSNGLEIAVKRLKKNSSQ-GA 362  
 CRK13 PVNYK-----YNDLKAATKEFSAENKLGEFGFGEVYKGTLPNGKVVAVKKLVLGKSSKME 361  
 CRK14 PKKYK-----YSDILKAATNKFSEKNKLGEFGFGEVYKGTMTKNGKVIIVKRLISGSSKIN 364  
 CRK15 PVNYK-----YNDLKAATKKFSAENKLGEFGFGEVYKGTLPNGKVVAVKKLVLGKSSKME 359  
 CRK16 SLQFN-----FDTIRVATEDFSDSNKLQGGGFGVYWGRLSNGQIIIVKRLSRDSGQ-GD 371  
 CRK17 SLRFE-----LAKIEAATNRFKENMIGKGGFGEVYRGILSDGQEIIVKRLTGSSRQ-GA 386  
 CRK18 GLQFD-----LVTIEAATNKFSPENEIGKGGFGEVYKGIILDRQIAVKRLSKSSRQ-GS 381  
 CRK19 GLQFD-----LATIKLATDNFSNEREIGKGGFGEVYKGVLDGRHIAVKRLSIGSKQ-GS 376  
 CRK20 GLQFD-----LAIIEAATNNSNENKIGKGGFGEVYKGIILSCGLHIGVRLSQSSTQ-GS 370  
 CRK21 SLEFD-----MATIEAATNKFSEERRIGKGGYGEVYKGIPLNGEEVAVKRLSTNSKQ-GE 374  
 CRK22 SLQFD-----FDTIEAATNKFSDENKIGRGGFGVYKGVLSNGQEIIVKRLSVTSLQ-GA 368  
 CRK23 SLQFD-----LATIEAATNRFSDENKIGQGGFGVYKGVLPDGRQIAVKRLSVTSLQ-GA 369  
 CRK24 SLRFD-----LATIEAATNFSNEMKIGEGGFGAVYKGTFPNGEIIIVKRLSRTSLQ-GD 379  
 CRK25 SLQFD-----LATMEVATKKFSLNKRIGEGGFGVYKGIPLDGRQIAVKRLSHSSGQ-GA 374  
 CRK26 SLQFS-----LATIEAATNKFSEYENKIGRGGFGEVYKGIILDRHIAVKRLSHTSRQ-GV 376  
 CRK27 TLPLE-----FASIMVATNNSDANKLGEFGFGEVYKGRLSYGEVAVKRLSKNSLQ-GN 366  
 CRK28 SLQFN-----FDTIRVATEDFSDSNKLQGGGFGVYWGRLSNGQMIIVKRLSRDSGQ-GD 391  
 CRK29 SLQFN-----FDTIRVATEDFSDSNKLQGGGFGVYWGRLSNGQMIIVKRLSRNSGQ-GD 375  
 CRK30 SLQFD-----FDTIRVATEDFSDSNKLQGGGFGVYRGRLPNGQMIIVKRLSSGSSQ-GD 383  
 CRK31 SLQFN-----FDTIRVATADFSDSNKLQGGGFGVYRGKLPNGEIIIVKRLSRNSGQ-GD 379  
 CRK32 SLQFN-----FDTIRVATEDFSDSNKLQGGGFGVYWGRLSNGQIIIVKRLSRNSGQ-GD 391  
 CRK33 SLQFN-----FDTIRVATEDFSDSNKLQGGGFGVYWGRLPNGQIIIVKRLSRDSGQ-GH 377  
 CRK34 PLQNN-----FNTIEAATNNGFADSNKLQGGGFGVYKGLSNGQEIIVKRLSRDSGQ-GD 376  
 CRK35 SLQFN-----FETIRVATNEFADSNKVGQGGGFGVYRGRLSNGQAIIVKRLSSDSGQ-GD 372  
 CRK36 SLQIR-----FSIIREATDDFSDSNKLQGGGFGVYRGTLPNGQEIIVKRLSANSRQ-GD 389  
 CRK37 SLQIR-----FSIIREATDDFSDSNKLQGGGFGVYRGTLPDGQEIIVKRLSANSRQ-GN 383  
 CRK38 SLQFN-----LALIEAATNNGFADSNKIGKGGFGEVYKGIILDGTSIAVKRLSRNSKQ-GL 382  
 CRK39 SLQFN-----LSTIQVATSNFSDSNKLGEFGFGEVYQKLSNGQVIIVKRLSRNSGQ-GD 377  
 CRK40 SLQFN-----LNTIQVATSNFSDSNKLGEFGFGEVYQKLSNGQVIIVKRLSTNSGQ-GD 381  
 CRK41 SLNYK-----YETLEKATDYFNSSRKLQGGGAGSVFKGILPNKKVIAVKRLIFNNRQ-WV 364  
 CRK42 TLNTDLPPIIPLITVLQSTDNFSEASKLGEFGFGEVYKGIPLDGRQIAVKRLSKFSGQ-GS 363  
 CRK43 TWNTDLPRIPIFATILQSTYNFSEASKLGEFGFGEVYKGTLPDGTQIAVKRLSKFSGQ-GS 389  
 CRK44 KLNGDLPTIPLIAVLHSTNNFSEASILGEFGFGEVYKGIPLDGRQIAVKRLSQFSGQ-GS 348  
 CRK45 KLNGDLPTIPLIAVLHSTNNFSEAFKLGEFGFGEVYKGIPLDGRQIAVKRLSKFSGQ-GS 360  
 CRK46 TLNPDVPIIPLNTILQSTDNFSEASKLGEFGFGEVYKGTLPDGRKIAVKRLSESSGQ-GS 391

: . \* \* : \* . \* . \* \* : : . : \* : \*

CRK1 ADFYNEVNIISSEHKNLVRLLGCSCSGPESLLVYEFLPNKS LDRFIFD-KNKGKELNWE 420  
 CRK2 ADFYNEVNIISSEHKNLVRLLGCSCSGPESLLVYEFLPNKS LDRFIFD-KNKGKELNWE 420  
 CRK3 DHFFNEVNLIISGHHKNLVRLLGCSSITGPESLLVYEFVFNHSLYHLSG-RRNSQQLTWE 420  
 CRK4 EEFKNEVVVAKLQHRNLVRLLGFC LQGE EKILVY EYVPNKSLDYTLFD-PEKQSELDWR 452  
 CRK5 DHFFNEVNLIISDIQKNLVRLLGCSSITGPESLLVY EYVPNQSLYDHLVS-RRISQPLSWE 431  
 CRK6 ADFYNEVNIISSEHKNLVRLLGCSCSGPESLLIYEF LANRSLDRFIFD-KNKGRELNWT 422  
 CRK7 EGFFNEVNLIISGHHKNLVRLLGCSSIEGPESLLVYEFVFNHSLYHLSG-KDSEDALNWE 400  
 CRK8 DDFNEVNLIISGHHKNLVRLLGCSSIEGPESLLVY EYLPNKSLDHFLFE-KDKTRILKWK 429  
 CRK9 AQFKTEVLLIAKLQHRNLVIFIGFCLEEE EKILY EYVPNKSLDHFLFD-SQPQKLLSWC 671  
 CRK10 EEFKNEVIFIAKLQHRNLVRLLGCCIEENEKLLVY EYMPNSSLD SHLFN-EEKRKQLDWK 439  
 CRK11 EEFKNEIILIAKLQHRNLVLAGCVQNEKLLVY EYMPNSSLD FHFLFD-TNKGVLHNLWI 440  
 CRK12 IEFKKEVLLISKLQHRNLVRLLGFCVERNEKILY EYFNHKS LDIYLLSSKS\*----- 414  
 CRK13 DDFEGEVKLISNVHHRNLVRLLGCSSKGQERILVY EYMANSSLDKFLFG-HRKG-CLSWK 419



|                                 |                                                                |     |
|---------------------------------|----------------------------------------------------------------|-----|
| CRK14                           | DDFESEVTLISNVHHRNLVRLGLGCCSNQDRILVYEFMANNSLDKFLFG-KRKG-SLSWK   | 422 |
| CRK15                           | DDFESEVKLISNVHHRNLVRLGLGCCSKQERILVYVEYMANSSLDKFLFG-NRKG-SLSWK  | 417 |
| CRK16                           | TEFKNEVLLVVKLQHRNLVRLGLGFCLEGRERLLVYEFVNKSLDYFIFD-PSMAQQLDWE   | 430 |
| CRK17                           | VEFKNEVQVIACLQHRNLVRLGLGFCLEDEKKILVYEVKNKSLDYFLSD-IKKRALLWS    | 445 |
| CRK18                           | VEFRNEILLIAKLQHKNLVAFIGFCLEEEEEKILVYEVSNRSLDYFLFG-YP-EEEKLSWY  | 439 |
| CRK19                           | VEFKNEILLIAKLQHRNLVAFMGFCLEEEEEKILVYEVNRSLDYFLFG-NQ-QQKLSWH    | 433 |
| CRK20                           | IEFKNEVLLIAKLQHRNLVELIGFCLAAQEKILVYKFMHNGSLDKFLFG-NQ-QKTLWS    | 428 |
| CRK21                           | EEFKNEVLLIAKLQHKNLVRLIGFCQEDREKILVYEVVNKSLDHFLLD-SQKRRVLTWS    | 438 |
| CRK22                           | VEFRNEAALVAKLQHRNLVRLGLGFCLEGEQEKILVYIIPNKSLDHFLLD-PVKQRELDWS  | 427 |
| CRK23                           | VEFRNEAALVAKLQHRNLVRLGLGFCLEGEQEKILVYIIPNKSLDYFLFD-SIKQRELDWS  | 428 |
| CRK24                           | REFKNEVLLVAKLQHRNLVRLGLGFCMEGTEKILVYEFIQNSSLDRLFPG-HEDQGLDWA   | 438 |
| CRK25                           | AEFKNEILLIAKLQHRNLVTLGLGFCLEGEQEKMLVYEFVSNKSLDYFLFD-PDKSRQMKWS | 433 |
| CRK26                           | LEFKNEILLIAKLQHRNLVTLIGFCLENQEKILVYEF---FDYIFTD-SHKTRLLSWI     | 431 |
| CRK27                           | TEFKNEVLLVAKLQHRNLVKLLGFCLERRERLLVYEFVNKSLDFFIFD-EDRREQLDWE    | 425 |
| CRK28                           | TEFKNEVLLVVKLQHRNLVRLGLGFCLEGRERLLVYEFVNKSLDYFIFD-PAMNAQLDWE   | 450 |
| CRK29                           | TEFKNEVLLVVKLQHRNLVRLGLGFCLEGRERLLVYEFVNKSLDYFIFD-PAMKAQLDVG   | 434 |
| CRK30                           | TEFKNEVLLMAKLQHRNLVRLGLGFCLEGRERLLVYEFVNKSLDYFIFD-PVKKAQLDWE   | 442 |
| CRK31                           | TEFKNEVLLVVKLQHRNLVRLGLGFCLEGRERLLVYEFVNKSLDYFIFD-PAMKAQLDWE   | 438 |
| CRK32                           | TEFKNEVLLVVKLQHRNLVRLGLGFCLEGRERLLVYEFVNKSLDYFIFD-PAMKAQLDVG   | 450 |
| CRK33                           | TEFKNEVLLVVKLQHRNLVRLGLGFCLEGRERLLVYEFVNKSLDYFIFD-PTMKAQLDWE   | 436 |
| CRK34                           | LEFKNEVLLAKLQHRNLVRLGLGFCLEGRERLLVYEFVNKSLDYLIFD-PTMKPQLNWE    | 435 |
| CRK35                           | TEFKNEVLLAKLQHRNLVRLIGFCLERRERLLVYEFVNKSLDYFIFD-PIKKTRLDWQ     | 431 |
| CRK36                           | TEFKNEVLLAKLQHRNLVRLHLFCMEGREKLLVYEFVNKSLDYFIFD-ETKRAQLDWY     | 448 |
| CRK37                           | TEFKNEVLLAKLQHRNLVRLGLGFCMEGREKLLVYEFVNKSLDYFIFD-KTKRAQLDWY    | 442 |
| CRK38                           | EEFKNEVLLISKLQHRNLVTFMGFCVNEEEKILVYEVTHKSLDYFLFD-TQQEKFLTWP    | 441 |
| CRK39                           | LEFKNEVLLAKLQHRNLVRLGLGSLQGREKLLVYEFVNKSLDYFIFD-PTEKAQLDWD     | 436 |
| CRK40                           | LEFKNEVLLAKLQHRNLVRLGLGSLQGREKLLVYEFVNKSLDYFIFD-PTEKAQLDWD     | 440 |
| CRK41                           | DEFFNEVNLIISGIEHKNLVKLLGCSIEGPESLIVYEYLPKKSLDQFIFE-KNRTQILNWK  | 423 |
| CRK42                           | EEFNNEVMSIAKLQHRNLVRLFGCCLEENKILVYEYMPNASLYFHFLD-DEKRRQLDWK    | 422 |
| CRK43                           | EEFNNEVMSIAKLHRNLVRLLACCSEGENKILVYEYLPKNKSLDHFLLD-VEKRRKFDWK   | 448 |
| CRK44                           | QEFKNEVMFIAKLQHRNLVRLGLGCCLEENKILVYEYMCNASLDYFLGDEKRRKQLDVG    | 408 |
| CRK45                           | QEFKNEVMFIAKLQHRNLVRLGLGCCLEENKILVYEYMCNSSLDFHFLGDEKRRKQLGWR   | 420 |
| CRK46                           | EEFNNEVMFIAKLQHRNLVRLLACCLEEKILVYEYMTNASLDHFLLD-ERKRRQLDWK     | 450 |
| * * . * * * . . . * * * . . . * |                                                                |     |

CRK40 TRYKIIIGIARGLLYLHQDSRLRIIHRDLKASNILLDKEMIPKISDFGIARLMTAGQTQ- 499  
 CRK41 QRFNIIILGTAEGLAYLHEGTKIRIIHRDIKSSNVLLDDNLTPKIIADFGLVRCFGADKSH- 482  
 CRK42 LRLRIINGIARGLLYLHEDSRLRVIHRDLKASNVLDDHDMNPKISDFGLARAFEIGQNQ- 481  
 CRK43 LRLSIIHGIARGILYLHEDSQLRVIHRDLKASNVLDDHDMNPKISDFGLARAFEIGQNQ- 507  
 CRK44 LRLSIIINGIARGILYLHEDSRLKVIHRDLKASNVLDDDEMNPKISDFGLARAFEIGENQ- 467  
 CRK45 LRLSIIINGIARGILYLHEDSRLKVIHRDLKASNVLDDDEMNPKISDFGLARAFEIGQNQ- 479  
 CRK46 LRLSIIHGIAGLLYLHEDSRLKVIHRDLKASNVLDDDEMNPKISDFGLARSFEKGQNQ- 509

CRK1 -I-STAIAGTLGYMAPEYLAHGQLTEKADVYSFGVLLLEMTGRQNNRSKVSEY---SDS 534  
 CRK2 -I-STAIAGTLGYMAPEYLAHGQLTEKADVYSFGVLLLEMATGRQNNRSKESDD---SDS 534  
 CRK3 -L-STAIAGTLGYMAPEYVVLGKLTEKADVYSFGVLIMEIISGKKSTSFV--QN---SYS 531  
 CRK4 -GNTDRIVGTGYMAPEYAMHGEFSVKSVDVYSFGVLLMEIISGKKNSSFYQTDG--A-ED 567  
 CRK5 -I-STVIAGTLGYMAPEYVIRGLSEKADVYSFGVLVIEIVSGKRNSFI--MN---SSS 543  
 CRK6 -I-TTAIAGTLGYMAPEYLAHGQLTEKADVYSFGVLLLEIITGRQNNRSKASEY---SDS 536  
 CRK7 -L-STGNSRTLGYMAPEYVSKGQLTEKVDIYAFGVLIVEIVCGKKNSDHI--PG---STS 512  
 CRK8 -L-STGIAGTLGYMAPEYLIQGGQLTDKADVYSFGVLVLEITASGRKNNVFR--ED---SDS 541  
 CRK9 -ESTDLIVGTCGYMSPEYAMFGQFSEKSDVFSFGVMILEIITGRKNMHSSEPRR--IADG 787  
 CRK10 -ESTRRVMGTGYMSPEYAMEGLYSVKSVDVFSFGVLLLEIICGRKNSGFHLSEH--G-QS 554  
 CRK11 -ANTIRVVGTYGYMAPEYAMEGLFSVKSVDVFSFGVLLLEIISGKRNSKFYLSQ--G-QS 555  
 CRK12 -----  
 CRK13 -L-CTKFAAGTLGYTAPEYAMHGLLSEKADTYSYGIVVLEIISGQKSTDVKVDED--DSEY 534  
 CRK14 -L-STRFAGTMGYTAPEYALHGQLSEKADTYSYGIVVLEIISGQKSTDVKIVDDDAEDEY 539  
 CRK15 -L-STRFAGTLGYTAPEYAIHGQLSEKADTYSYGIVVLEIISGQKSTDVKGDDED--GHEY 532  
 CRK16 -ANTSRIIVGTGYMAPEYAMHGQFSVKSVDVFSFGVLILEIVSGQKNSGINNGEN--M-ED 545  
 CRK17 -ESTGRIVGTGYMPPEYAMHGQFSVKSVDVFSFGVMVLEIISGIRKCCSSESEV--I-DD 560  
 CRK18 -AETNRIVGTGYMSPEYAMHGQFSEKSDVFSFGIMILEIITGKKNNGSYKSNE--DDGG 555  
 CRK19 -AETDRIVGTGYMSPEYAMLGQFSEKSDVFSFGIIVLEIITSKKNARSYESHN--MEEG 550  
 CRK20 -GKTKRIVGTGYMSPEYAMFGQFSEKSDIFSFGVMILEIVTGKKNINFHESQY--MPNG 544  
 CRK21 -GCTKRIVGTGYMSPEYAMHGKFSKSDVFSFGVMTLEIISGKKNSCSFESH--V-DD 548  
 CRK22 -VQTRIVGTGYMSPEYAMHGQFSEKSDVFSFGILVLEIVSGKKNAGLYQSKH--A-DD 541  
 CRK23 -VNTGRIVGTGYMSPEYAMRGQFSMKSDVFSFGVLVLEIVSGKKNNTDFYQSNH--A-DD 543  
 CRK24 NTRTRGRVGTFGYMSPEYAMHGKFSVKSVDVFSFGVLVLEIISGKKNSYRSHD--D-NE 555  
 CRK25 -GKTNRIVGTGYMSPEYAMGNFSEKSDVFSFGVIMLEIVSGKKNRHFVSD--H-ED 547  
 CRK26 -GSTNRIVGTGYMSPEYAMHGQFSEKSDVYSYGIVVLEIISGKKNSCSSLSD--V-DD 546  
 CRK27 -ANTSRRVGTGYMAPEYVIHGQFSVKSVDVFSFGVLVLEIVSGQKNSWVRGEN--E-GD 540  
 CRK28 -ANTSRIIVGTGYMAPEYAMHGQFSVKSVDVFSFGVLILEIVSGQKNSGINKGEN--M-ED 565  
 CRK29 -VNTNRIVGTGYMAPEYALHGQFSVKSVDVFSFGVLILEIVSGQKNGGISNREN--M-DD 549  
 CRK30 -ANTNRVVGTYGYMAPEYIMQGQFSVKSVDIFSFGVLLLEIVSGQKNSGFRHGEN--V-ED 557  
 CRK31 -ANTSRIIVGTGYMAPEYAMQGHSVKSVDVFSFGVLILEIVSGQKNSGINNGEN--M-ED 553  
 CRK32 -VNTNRIVGTGYMAPEYALHGQFSVKSVDVFSFGVLILEIVSGQKNGGISNREN--M-DD 565  
 CRK33 -ANTSRIIVGTGYMAPEYAMHGHSVKSVDVFSFGVLILEIVSGQKNSGINNGEN--V-ED 551  
 CRK34 -ANTSRIIVGTGYMAPEYAMHGQFSVKSVDVFSFGVLILEIVSGQKNSGINNGEN--M-ED 550  
 CRK35 -ANTHRIVGTGYMAPEYAIYGQFSTKSDVFSYGVVLVLEIVSGRKSIGSRHGER--V-ED 546  
 CRK36 -EDTQRVVGTYGYMAPEYALHGHSVKSVDVFSFGVLVLEIVSGKKNISIQHGEE--S-GD 563  
 CRK37 -EDTQRVVGTFGYMAPEYALHGQFSEKSDVFSFGVLVLEIVSGQKNISIQHGEE--T-GD 557  
 CRK38 -GSTKRITGTGYMAPEYAMFGQFSEKLDVYSFGVMVLEIISGRKNIGSYEPHR--IVNC 557  
 CRK39 -ENTSRVVGTFGYMAPEYIMQGQFSVKSVDVFSFGVLVLEIVSGQKNHGVVRDEKN--G-ED 551  
 CRK40 -ENTSRVVGTFGYMAPEYIMQGQFSVKSVDVFSFGVLVLEIVSGQKNHGVVRDEKN--G-EG 555  
 CRK41 -L-STGIAGTLGYMAPEYLIRGQLTDKADVYSFGVLVLEIVVCGRRNNVFR--ED---SGS 535  
 CRK42 -GNTKRVMGTGYMAPEYAMGGLFSVKSVDVFSFGVLVLEITGCRKNNGFYLSKH--G-QT 537  
 CRK43 -ANTKRVMGTGYMAPEYAMEGLFSVKSVDVFSFGVLVLEIICGRKNNGFYMSD---G-QT 562  
 CRK44 -AKTKRVVGTYGYMAPEYAMEGLFSVKSVDVFSFGVLVLEIICGRKNNGFHRSEH--G-QS 523  
 CRK45 -ANTKRIVGTGYMAPEYAMEGLFSVKSVDVFSFGVLVLEIICGRKNNGFHRSEH--G-QS 535  
 CRK46 -ANTRRVMTGYGYMAPEYAMEGLFSVKSVDVFSYGVVLVLEIICGKKNNGFYLSSEC--G-QS 565

CRK1 LVTV-AWKHFQAGTAEQLFDPNLVLQEDHNSEVKDEILRVVHIGLLCTQEVPSLRPIMSK 593  
 CRK2 LVTV-AWKHFQAGTAEQLFDPNLVLQEDHNIEVKDEILRGVHIGLLCTQEVPSLRPIMSK 593  
 CRK3 ILHRPLWIKQAM\*----- 544  
 CRK4 LLSY-AWLLWKDGTPLLEMDPILRES-----YNQNEIIRSIHIGLLCVQEDPEDRPTMAT 621  
 CRK5 LLQT-VWRLYGSNRLSEIVDPTLECP-----FPAAEACQLLQIGLLCAQATAELRPSMSV 597  
 CRK6 LIIM-TWKHFQSGTAEQIIDPYLLDDNHRSKVKNDILRVVQIGLLCTQEISSLRPSMSK 595  
 CRK7 LLHS-VWKNYKTNITASVDPALHGK-----LTVEEASNTLQTLGLCTQSTVTILRPSMSE 566  
 CRK8 LLQT-VWKLYQSNRLGEAVDPCLGNE-----FPAREASRVFQIGLLCTQASASLRPSMAQ 595  
 CRK9 LLNY-VWKQRDQTPLSIINSNIKEN-----YAEIEVVKCIQIGLLCVQENPDVRPTMTV 841  
 CRK10 LLVH-SRWLWEGEKSLEMLDPMLEKT-----YKGESEVMKCIHIGLLCVQEDAADRPTMTS 608  
 CRK11 LLVY-AWNLWCESGLEMLDPSIEKS-----SVHSEVVKCMQIGLLCVQEDAADRPTMTS 609  
 CRK12 -----  
 CRK13 LLQR-SWKLYERGSHELELEEAIDPN-----EYDAEEVKRIIEIALCTQATAATRPTMSE 589  
 CRK14 LLRK-AWKLNERGMHLELVDKSLDPN-----SYDAEEVKVLDIALCTQPSAAMRPAMSE 594  
 CRK15 LLQR-TWKLYERGTHLELVDKAIEPN-----EYDAEDVKKIEIALCTQASAAATRPTMSE 587  
 CRK16 LLNF-AWRNWKEGKAINIVDPSLNS-----NSRNEMLRCIHIGLLCVQENLVDPRPTMAN 598  
 CRK17 IRKH-AWTWTKETPLELLDPHVGGP-----YSCEEVIKYIHIGLLCVQEDPNDRPTMAT 614

CRK18 LMSN-VWRNWTNQTPLSILEPNMKEN-----YFETEVI RCIEIGLLCVQENPNMRPTIAE 609  
 CRK19 LMTY-VVRHWKNETPMSILDPNMKEN-----YYETEVI RCIQIGLLCVQENPNIRPTMAT 604  
 CRK20 LLSY-VVRKWKEKQLSIIDPLLEEN-----YSKNEVIKCIHISLLYVQEKKSIRPTIAD 598  
 CRK21 LLSY-AWNNWRDESPFVLLDPALEES-----YCPNEVEKCIQIGLLCVQENPDERPIIGT 602  
 CRK22 LLTL-AWKHWTEETPMEFLDPTLRGS-----YSRNEVNRCIHIGLLCVQESPSDRPSMAT 595  
 CRK23 LLIF-AWKWTEQTTMEFLDPA LRGS-----CSRNEVNRCIHIGLLCVQENPSDRPSMAT 597  
 CRK24 LLSF-AWKNWIDQTPFQILDPKLRGS-----YSRNEVQRCIHIALLCVEENPVERPSMAT 609  
 CRK25 LLSY-AWDQWRDQTPINILDQNIKES-----CNVSEVVKCIQIGLLCVQEKPDRTMTQ 601  
 CRK26 LLSD-AWRYWRDETPLKILDQNI EES-----SNHNEVLKCIQIGLLTYHNNLNALLSNLS 600  
 CRK27 LLTY-TWQTWKRRTMSNIVDPTIS-----GSSNEIMRCIHIALLCVQEKGDRTPTMAS 592  
 CRK28 LLSF-AWRNWKEGKAINIVDPSLNN-----NSRNEMLRCIHIGLLCVQENLVDRPTMAN 618  
 CRK29 LLSF-AWRNWKEGKAINIVDPSLNS-----NSRNEMLKCIHIGLICVQENLVDRPTMAN 602  
 CRK30 LLSF-TWRNWRDGTAVNIVDPSLEN-----NSRNEVMRCIHIGLLCVQENLTDRTPTMAT 610  
 CRK31 LLSF-AWRNWKEGKAINIVDPSLNS-----NSRNEMLRCIHIGLLCVQENLVDRPNMTN 606  
 CRK32 LLSF-AWRNWKEGKAINIVDPSLNS-----NSRNEMLRCIHIGLLCVQENLVDRPNMTN 618  
 CRK33 LLSF-AWRNWKEGKAIYIVDPSLNS-----NSRNEMLRCIHIGLLCVQENLVDRPTMAN 604  
 CRK34 LLSF-AWRSWKEGKAINVVDPSLNN-----NSRNEMLRCIHIGLLCVQENLVDRPTMAN 603  
 CRK35 LLSI-TWRNWKDGTIANIVDPTLIK-----GSQNEIMRCIHIGLLCVQENMDARPTMTS 599  
 CRK36 LRHI-AWRSWREGRATDIVDPTLNN-----GSESEIMRCMHIGLLCVQDSVAARPTMAS 616  
 CRK37 LRHI-AWRSWREGRATDIVDQTLND-----GSESEIMRCIHIGLLCVQDNVAARPTMAS 610  
 CRK38 LLNF-VWEHWRDETPLSTLDPR LKEN-----HSNIEVIRC VKIGLLCVQENPDVRPTMLT 611  
 CRK39 LLSF-VWRNWIEGVTNII DPTLKN-----SSQNEMIRCI GIGLLCVEEDLNNRPTMAN 604  
 CRK40 LLSF-VWRNWREGVTNIMDPTLNN-----SSLDEMIRCI GIGLLCVEEDLNNRPTMAN 608  
 CRK41 LLQT-VWKLYRSNTL TEAVDPCLGDD-----YPATEASRVFRIGLLCTQASASLRPSISQ 589  
 CRK42 LLLY-VSHPFGLI---NQISTILAN\*----- 559  
 CRK43 LLVY-AWRIWYEGKCLELMDPVLEKS-----FIGDEVERCIQIGLLCVQEDARDRTPTMSD 616  
 CRK44 LLLY-AWSIWCAGKCLELMDPALIKS-----FIASEVVKCLHIGLLCVQQDAADRPTMTST 577  
 CRK45 LLLY-AWSIWCAGKCLELMDPALIKS-----FIASEVVKCLHIGLLCVQQDAADRPTMTST 589  
 CRK46 LTTY-AWKVWCAGKCLELMDPVLEEC-----CSESEVVKCIHIGLLCVQEDAADRPTMTST 619

CRK1 TLQMLTKKE-ENLIAPSNPPFLDENTMELHDTSGDP-----FYPLN-AA 635  
 CRK2 TLQMLTKKE-ENLIAPSNPPFLDKNTMELHDTNGDP-----FYPLN-ES 635  
 CRK3 ----- 635  
 CRK4 IVMLDS-NTVTLPKRAFFFIHSGTD-ATMPK--GQ-Q-----FDQSITKSLP 666  
 CRK5 VVKMV-NHN-HEIPQTPPFINS GSSELSRSGLP GHN-----FQPESNTQ 641  
 CRK6 ALKMLTKKE-EHVEAPSNPPFIDE STMELHDQNDGP-----FYPLN-AA 637  
 CRK7 VVQMLTKKD-YAIPSPKQKPF LNFSGLSQNDRTVSSKGLASARSSFHSTTSSLIPNDST 625  
 CRK8 VACMLSNSD-LDVPKPKQPF LNSRLLNQTPPLGFSTD-NSSNTFKKIGVSYSPTQSSS 653  
 CRK9 IVSYLDG-HFSELPTPQKPAFFLHGRMDSKSI GR-----KSSSRKSMNISTP 887  
 CRK10 VVVMLAS-DTMA LSNPNHAFSVGRKTKEEE-----STSKGSKD 646  
 CRK11 VVHMLAS-DTMSLPNTPRAF SVGRTVIEQE-----SSSNTSMQ 647  
 CRK12 ----- 647  
 CRK13 VVLLKSKNSVEHMRPTMPVFVGTNVMTREGNSTS----- 624  
 CRK14 VVALLSSNDLLEHMRPTMPLFIESKLRPHRDIFASIGS-----S 633  
 CRK15 IVVLLKSKSLVEHLRPTMPVFVATNMKTR ESKSSSTSG-----S 626  
 CRK16 IVMLNS-YLSLPIPAEP AFYMNSTRSLPEMQSWDY-NS-----RETGSSEPIKLSAQ 651  
 CRK17 IVFYLNN-HSINLPSNP EPGYFKSNRKDNMATNE-----ELDNII 653  
 CRK18 VVSYLND-LTIELPSPQEP AFFSHGIDQKAVMQQ-----ESSNSSVIGSMP 655  
 CRK19 VVSYLNN-HSLELPSPQEP AFFLHGIDKK-VMQQ-----GSSSTISANSSMP 649  
 CRK20 VVSYLDGRHTLEFPSPQEP AFFLEDKMDTKT-----STE H 633  
 CRK21 IVSYLNN-TSVQVPIPLEPAFFMHGRVRRHSTE H--QP-SS-----EFTL-KRHWNE--L 650  
 CRK22 IALMLNS-YSVTMSMPRQPASFLRGRSP-NRLNP--GL-DS-----DQSTTNQSTSSIP 645  
 CRK23 IALMLNS-YSVTLSMPRQPASFLRGRGP-NRLNQ--GL-ES-----DQSTTDQFTSCSVP 647  
 CRK24 IMLALNA-YSVTLGLPKPAFFVRGRATTDR LRQ--QL-DS-----DH-----SNTSSVP 655  
 CRK25 VVSYLSG-SLSELGLPEKPINCNQSGIVQRML-----VGSSSSGSA 641  
 CRK26 SNTDIDY-GFYNFSGYQDSS TVNAIGLCRGDV-----K-PDACRRC 639  
 CRK27 VALMLNS-HSVTLPLPSKPAFSIDSTLSLVIQ-----SNEPNI 629  
 CRK28 IVMLNS-YLSLPIPAEP AFYMNSTRSLPEMQSWEY-NS-----REPGSSEAFKSVQ 671  
 CRK29 IMLMLNS-YLSLPIPAEP AFYINSRTRSLPETQSWEY-NS-----RETGSREAKLISAQ 655  
 CRK30 IMLMLSS-YSLGLPIPSEPAFYANSTARSLPATSSWGH-SS-----RATA-----NQSAQ 658  
 CRK31 IMLMLNS-YLSLPIPAEP AFYMNSTRSLPEMQSWDY-NS-----RETGSSEPIKLSAQ 659  
 CRK32 IMLMLNS-YLSLPIPAEP AFYMNSTRSLPEMQSWDY-NS-----RETGSSEAILKSAQ 671  
 CRK33 IVMLNS-YLSLPIPAEP AFYMNSTRSLPEMQSWDY-NS-----RETRSESIRKSAQ 657  
 CRK34 IVMLNS-YLSLPIPAEP AFYMNSTRSLPETQSWEY-NS-----RETGSSEAILKSAQ 656  
 CRK35 VMLMLNS-YSLTLVPVSEPAFVVDSTRSFPNMLSLEH-NS-----RETGSSESTNKSSQ 652  
 CRK36 VVPMNS-HSFSLQVPLAPAFYGDAMSGIFEDMKLWEI-NS-----GTTRSIESTNRNDQ 669  
 CRK37 VVSMNS-PSLSLQVPMAPAFYGNAMSGIFEDMQ LREI-NS-----GTRSNESTNRKDQ 663  
 CRK38 IVSYLNG-HLEVELPSPVEPTFSLNRETNP IVA-Y-----E-----SNLRQS 650  
 CRK39 VALMLNS-CSITLVPVKKPAFFIDSATGSLPNMSWED--S-----WPTRGTSQSSGRSAQ 655  
 CRK40 VALMLNS-CSITLVPVKKPAFFIDSATGSLPNMSSED--S-----WATKGTQSSGISAQ 659  
 CRK41 VVYMLTNSN-EDVPTPNQPPFLSTGMLDSGSKSYTTN-SFISNALKKIGVSYISESS 647  
 CRK42 ----- 647  
 CRK43 VVVMLAS-DTVAIPKPKHPAFSIGRTS-EEV-----STSRSSKN 653

CRK44 VVLM LGS-DTMDLPKPNHPAFSVGKLT SKEA-----SASENSKN 615  
 CRK45 VVLM LGS-ESMALPKPNHPAFSVGKLT SKEA-----SASRSTKN 627  
 CRK46 VVVMLAS-DMMSLPKPNQPAFSVGRMTLDDA-----STSKSSKN 657

CRK1 DSIATMSRSSFYPR\*----- 650  
 CRK2 DSIATMSRSSYPR\*----- 650  
 CRK3 -----  
 CRK4 MSINDVSISEMDPR\*----- 681  
 CRK5 SSANTMTESQIEPR\*----- 656  
 CRK6 DSLATMSHSSFYPR\*----- 652  
 CRK7 VLENSFSDHSDMFIAGSPDSNIQINM--RAPEPR\*----- 657  
 CRK8 SC-----SLIRSSKTEETILEV\*----- 671  
 CRK9 LSI NEMSTSECIPR\*----- 902  
 CRK10 PSVNDVTISNILPR\*----- 661  
 CRK11 YSVNEVTVSEVIPR\*----- 662  
 CRK12 -----  
 CRK13 SSNATASISIASAR\*----- 639  
 CRK14 ASNGTASDSIVPA\*----- 647  
 CRK15 SSNATASISVLSAR\*----- 641  
 CRK16 ESENEVSITELYPR\*----- 666  
 CRK17 DSINEISLTKFFPR\*----- 668  
 CRK18 FSVNEMSISDFYPR\*----- 670  
 CRK19 FSVNEMPTTSFYPR\*----- 664  
 CRK20 FSVNEMSISTYYPR\*----- 648  
 CRK21 MDIGKN\*----- 657  
 CRK22 WSVNEVSITELYPR\*----- 660  
 CRK23 WSVNEVSLTEVYPR\*----- 662  
 CRK24 FSAGDSLITEVYPR\*----- 670  
 CRK25 LSKNEMSVTIFIPR\*----- 656  
 CRK26 LND SKVLLTQLCPNQKEAIGWYDQCMLRYSNRSLFNTMETSHSFALWNPGNASDIDQFNL 699  
 CRK27 QSVNEASITEPFAR\*----- 644  
 CRK28 ESENEASISELYPR\*----- 686  
 CRK29 ESENEASITELYPR\*----- 670  
 CRK30 ESENENSITEPYPR\*----- 673  
 CRK31 ESENEASITELYPR\*----- 674  
 CRK32 ESENEASITELYPR\*----- 686  
 CRK33 ESENEASITELYPR\*----- 672  
 CRK34 ESENEASITELYPR\*----- 671  
 CRK35 YSVDEASITETYPYPR\*----- 667  
 CRK36 DSLNEASITDPYPR\*----- 684  
 CRK37 DSLSEASITEPYPR\*----- 678  
 CRK38 TSNNEMSVSKLYPR\*----- 665  
 CRK39 ESVNEASITELYPR\*----- 670  
 CRK40 ESVGASITELYPR\*----- 674  
 CRK41 SR-----NSDGPSRSEESIVQV\*----- 665  
 CRK42 -----  
 CRK43 LSINNITSSITLPR\*----- 668  
 CRK44 RSINDVTVSAVLAR\*----- 630  
 CRK45 LSINDVTVSTD LAR\*----- 642  
 CRK46 LSINDVTVSNIFPR\*----- 672

CRK1 -----  
 CRK2 -----  
 CRK3 -----  
 CRK4 -----  
 CRK5 -----  
 CRK6 -----  
 CRK7 -----  
 CRK8 -----  
 CRK9 -----  
 CRK10 -----  
 CRK11 -----  
 CRK12 -----  
 CRK13 -----  
 CRK14 -----  
 CRK15 -----  
 CRK16 -----  
 CRK17 -----  
 CRK18 -----  
 CRK19 -----  
 CRK20 -----  
 CRK21 -----

CRK22 -----  
 CRK23 -----  
 CRK24 -----  
 CRK25 -----  
 CRK26 VLGNLLDSLIGQATTLGDSQRKFAAANVSESVFQTIYGLVQCTPDLSEQDCSECLTGAIS 759  
 CRK27 -----  
 CRK28 -----  
 CRK29 -----  
 CRK30 -----  
 CRK31 -----  
 CRK32 -----  
 CRK33 -----  
 CRK34 -----  
 CRK35 -----  
 CRK36 -----  
 CRK37 -----  
 CRK38 -----  
 CRK39 -----  
 CRK40 -----  
 CRK41 -----  
 CRK42 -----  
 CRK43 -----  
 CRK44 -----  
 CRK45 -----  
 CRK46 -----

CRK1 -----  
 CRK2 -----  
 CRK3 -----  
 CRK4 -----  
 CRK5 -----  
 CRK6 -----  
 CRK7 -----  
 CRK8 -----  
 CRK9 -----  
 CRK10 -----  
 CRK11 -----  
 CRK12 -----  
 CRK13 -----  
 CRK14 -----  
 CRK15 -----  
 CRK16 -----  
 CRK17 -----  
 CRK18 -----  
 CRK19 -----  
 CRK20 -----  
 CRK21 -----  
 CRK22 -----  
 CRK23 -----  
 CRK24 -----  
 CRK25 -----  
 CRK26 EIPQCCDGKRGGRILRPSCNFRYEIYRFYDLTDVKIPPAPAPAPKVSVLPPLSTDTLSTE 819  
 CRK27 -----  
 CRK28 -----  
 CRK29 -----  
 CRK30 -----  
 CRK31 -----  
 CRK32 -----  
 CRK33 -----  
 CRK34 -----  
 CRK35 -----  
 CRK36 -----  
 CRK37 -----  
 CRK38 -----  
 CRK39 -----  
 CRK40 -----  
 CRK41 -----  
 CRK42 -----  
 CRK43 -----  
 CRK44 -----  
 CRK45 -----  
 CRK46 -----

|       |                                                                  |
|-------|------------------------------------------------------------------|
| CRK1  | -----                                                            |
| CRK2  | -----                                                            |
| CRK3  | -----                                                            |
| CRK4  | -----                                                            |
| CRK5  | -----                                                            |
| CRK6  | -----                                                            |
| CRK7  | -----                                                            |
| CRK8  | -----                                                            |
| CRK9  | -----                                                            |
| CRK10 | -----                                                            |
| CRK11 | -----                                                            |
| CRK12 | -----                                                            |
| CRK13 | -----                                                            |
| CRK14 | -----                                                            |
| CRK15 | -----                                                            |
| CRK16 | -----                                                            |
| CRK17 | -----                                                            |
| CRK18 | -----                                                            |
| CRK19 | -----                                                            |
| CRK20 | -----                                                            |
| CRK21 | -----                                                            |
| CRK22 | -----                                                            |
| CRK23 | -----                                                            |
| CRK24 | -----                                                            |
| CRK25 | -----                                                            |
| CRK26 | VQVENDDEIRSSETLQLDFSTIMTATNNFSDANRLGQGGFGPVYKGKLSNGQDVAVKRLC 879 |
| CRK27 | -----                                                            |
| CRK28 | -----                                                            |
| CRK29 | -----                                                            |
| CRK30 | -----                                                            |
| CRK31 | -----                                                            |
| CRK32 | -----                                                            |
| CRK33 | -----                                                            |
| CRK34 | -----                                                            |
| CRK35 | -----                                                            |
| CRK36 | -----                                                            |
| CRK37 | -----                                                            |
| CRK38 | -----                                                            |
| CRK39 | -----                                                            |
| CRK40 | -----                                                            |
| CRK41 | -----                                                            |
| CRK42 | -----                                                            |
| CRK43 | -----                                                            |
| CRK44 | -----                                                            |
| CRK45 | -----                                                            |
| CRK46 | -----                                                            |

|       |       |
|-------|-------|
| CRK1  | ----- |
| CRK2  | ----- |
| CRK3  | ----- |
| CRK4  | ----- |
| CRK5  | ----- |
| CRK6  | ----- |
| CRK7  | ----- |
| CRK8  | ----- |
| CRK9  | ----- |
| CRK10 | ----- |
| CRK11 | ----- |
| CRK12 | ----- |
| CRK13 | ----- |
| CRK14 | ----- |
| CRK15 | ----- |
| CRK16 | ----- |
| CRK17 | ----- |
| CRK18 | ----- |
| CRK19 | ----- |
| CRK20 | ----- |
| CRK21 | ----- |
| CRK22 | ----- |
| CRK23 | ----- |
| CRK24 | ----- |
| CRK25 | ----- |

CRK26 KNSLQGDIEFKNEVMLVAKLQHRNLVKLIGFCLERRERLLVYEFVPNKSLDFFIFEYVFR 939  
 CRK27 -----  
 CRK28 -----  
 CRK29 -----  
 CRK30 -----  
 CRK31 -----  
 CRK32 -----  
 CRK33 -----  
 CRK34 -----  
 CRK35 -----  
 CRK36 -----  
 CRK37 -----  
 CRK38 -----  
 CRK39 -----  
 CRK40 -----  
 CRK41 -----  
 CRK42 -----  
 CRK43 -----  
 CRK44 -----  
 CRK45 -----  
 CRK46 -----

CRK1 -----  
 CRK2 -----  
 CRK3 -----  
 CRK4 -----  
 CRK5 -----  
 CRK6 -----  
 CRK7 -----  
 CRK8 -----  
 CRK9 -----  
 CRK10 -----  
 CRK11 -----  
 CRK12 -----  
 CRK13 -----  
 CRK14 -----  
 CRK15 -----  
 CRK16 -----  
 CRK17 -----  
 CRK18 -----  
 CRK19 -----  
 CRK20 -----  
 CRK21 -----  
 CRK22 -----  
 CRK23 -----  
 CRK24 -----  
 CRK25 -----  
 CRK26 GQFSVKSDVYSFGVLVLEIVTDQKNSWACRGENEGDLLTYTWQNWREGTVSNIIDPTIID 999  
 CRK27 -----  
 CRK28 -----  
 CRK29 -----  
 CRK30 -----  
 CRK31 -----  
 CRK32 -----  
 CRK33 -----  
 CRK34 -----  
 CRK35 -----  
 CRK36 -----  
 CRK37 -----  
 CRK38 -----  
 CRK39 -----  
 CRK40 -----  
 CRK41 -----  
 CRK42 -----  
 CRK43 -----  
 CRK44 -----  
 CRK45 -----  
 CRK46 -----

CRK1 -----  
 CRK2 -----  
 CRK3 -----

```

CRK4 -----
CRK5 -----
CRK6 -----
CRK7 -----
CRK8 -----
CRK9 -----
CRK10 -----
CRK11 -----
CRK12 -----
CRK13 -----
CRK14 -----
CRK15 -----
CRK16 -----
CRK17 -----
CRK18 -----
CRK19 -----
CRK20 -----
CRK21 -----
CRK22 -----
CRK23 -----
CRK24 -----
CRK25 -----
CRK26 SSRNEIMRFIHIALLCVQEKVTD RPTMASVVLMLSSYSVSLPLPSKPAFSVRSRNVSVIQ 1059
CRK27 -----
CRK28 -----
CRK29 -----
CRK30 -----
CRK31 -----
CRK32 -----
CRK33 -----
CRK34 -----
CRK35 -----
CRK36 -----
CRK37 -----
CRK38 -----
CRK39 -----
CRK40 -----
CRK41 -----
CRK42 -----
CRK43 -----
CRK44 -----
CRK45 -----
CRK46 -----

```

```

CRK1 -----
CRK2 -----
CRK3 -----
CRK4 -----
CRK5 -----
CRK6 -----
CRK7 -----
CRK8 -----
CRK9 -----
CRK10 -----
CRK11 -----
CRK12 -----
CRK13 -----
CRK14 -----
CRK15 -----
CRK16 -----
CRK17 -----
CRK18 -----
CRK19 -----
CRK20 -----
CRK21 -----
CRK22 -----
CRK23 -----
CRK24 -----
CRK25 -----
CRK26 SEEYDPVSGNSIN* 1073
CRK27 -----
CRK28 -----
CRK29 -----

```



CRK30 -----  
CRK31 -----  
CRK32 -----  
CRK33 -----  
CRK34 -----  
CRK35 -----  
CRK36 -----  
CRK37 -----  
CRK38 -----  
CRK39 -----  
CRK40 -----  
CRK41 -----  
CRK42 -----  
CRK43 -----  
CRK44 -----  
CRK45 -----  
CRK46 -----
